# Supplementary material for: Polystyrene Nano- and Microplastic Particles Induce an Inflammatory Gene Expression Profile in Rat Neural Stem Cell-Derived Astrocytes In Vitro
Source: MDPI journal article supplement (doi:10.3390/nano14050429), 2024-02-27
Supplement: s1 [file s1]

Supplemental Table S1: 50nm GO terms

| Upregulated        | Term                                      | Count | %    | P-Value  |
|--------------------|-------------------------------------------|-------|------|----------|
| Biological Process | negative regulation of cell proliferation | 31    | 7.7  | 1.00E-05 |
|                    | response to lipopolysaccharide            | 24    | 6    | 1.00E-05 |
|                    | response to mechanical stimulus           | 15    | 3.7  | 4.70E-05 |
|                    | regulation of cell shape                  | 15    | 3.7  | 7.00E-04 |
|                    | positive regulation of cell proliferation | 17    | 4.2  | 1.60E-03 |
|                    | positive regulation of apoptotic process  | 24    | 6    | 1.90E-03 |
|                    | response to xenobiotic stimulus           | 28    | 6.9  | 2.60E-03 |
|                    | positive regulation of MAPK cascade       | 16    | 4    | 2.60E-03 |
|                    | positive regulation of cell migration     | 19    | 4.7  | 2.60E-03 |
|                    | inflammatory response                     | 21    | 5.2  | 2.60E-03 |
| Cellular Component | Cytoplasm                                 | 172   | 42.7 | 3.50E-09 |
|                    | extracellular space                       | 72    | 17.9 | 9.10E-09 |
|                    | cell surface                              | 39    | 9.7  | 3.20E-06 |
|                    | cytoplasmic vesicle                       | 27    | 6.7  | 3.20E-06 |
|                    | extracellular region                      | 44    | 10.9 | 3.20E-06 |
|                    | plasma membrane                           | 133   | 33   | 1.50E-05 |
|                    | golgi apparatus                           | 46    | 11.4 | 1.50E-04 |
|                    | Cytosol                                   | 112   | 27.8 | 1.80E-04 |
|                    | apical plasma membrane                    | 24    | 6    | 2.90E-04 |
|                    | perinuclear region of cytoplasm           | 35    | 8.7  | 3.00E-04 |
| Molecular Function | heparin binding                           | 17    | 4.2  | 7.90E-05 |
|                    | protein binding                           | 67    | 16.6 | 7.90E-05 |
|                    | growth factor activity                    | 16    | 4    | 7.90E-05 |
|                    | protease binding                          | 14    | 3.5  | 3.50E-04 |
|                    | identical protein binding                 | 68    | 16.9 | 5.30E-04 |
|                    | cytokine activity                         | 14    | 3.5  | 3.70E-03 |
|                    | chemokine activity                        | 7     | 1.7  | 8.30E-03 |
|                    | calcium-dependent phospholipid binding    | 8     | 2    | 8.40E-03 |
|                    | integrin binding                          | 12    | 3    | 1.40E-02 |

Supplemental Table S2: 500nm GO terms

| Upregulated        | Term                                        | Count | %    | P-Value  |
|--------------------|---------------------------------------------|-------|------|----------|
| Biological Process | response to lipopolysaccharide              | 36    | 4.9  | 5.40E-07 |
|                    | cellular response to tumor necrosis factor  | 26    | 3.6  | 1.40E-05 |
|                    | cellular response to interferon-gamma       | 20    | 2.7  | 1.70E-05 |
|                    | response to mechanical stimulus             | 19    | 2.6  | 5.50E-05 |
|                    | negative regulation of cell proliferation   | 41    | 5.6  | 5.60E-05 |
|                    | response to xenobiotic stimulus             | 45    | 6.1  | 7.50E-05 |
|                    | cellular response to lipopolysaccharide     | 31    | 4.2  | 7.50E-05 |
|                    | positive regulation of cell migration       | 30    | 4.1  | 8.70E-05 |
|                    | positive regulation of apoptotic process    | 37    | 5.1  | 1.20E-04 |
|                    | inflammatory response                       | 33    | 4.5  | 1.20E-04 |
| Cellular Component | extracellular matrix                        | 33    | 4.5  | 2.00E-06 |
|                    | cytoplasm                                   | 265   | 36.2 | 2.00E-06 |
|                    | cytoplasmic vesicle                         | 38    | 5.2  | 3.90E-06 |
|                    | plasma membrane                             | 221   | 30.2 | 4.10E-06 |
|                    | extracellular space                         | 98    | 13.4 | 6.70E-06 |
|                    | membrane                                    | 62    | 8.5  | 3.30E-05 |
|                    | cytosol                                     | 52    | 7.1  | 9.60E-05 |
|                    | axon                                        | 93    | 12.7 | 1.90E-04 |
|                    | perinuclear region of cytoplasm             | 178   | 24.3 | 1.20E-03 |
|                    | basement membrane                           | 37    | 5.1  | 1.50E-03 |
| Molecular Function | chemokine activity                          | 12    | 1.6  | 4.90E-05 |
|                    | integrin binding                            | 20    | 2.7  | 7.90E-04 |
|                    | heparin binding                             | 21    | 2.9  | 7.90E-04 |
|                    | identical protein binding                   | 107   | 14.6 | 1.10E-03 |
|                    | macromolecular complex binding              | 47    | 6.4  | 4.20E-03 |
|                    | growth factor activity                      | 18    | 2.5  | 4.20E-03 |
|                    | protein binding                             | 96    | 13.1 | 4.20E-03 |
|                    | protein kinase binding                      | 41    | 5.6  | 4.20E-03 |
|                    | CXCR chemokine receptor binding             | 6     | 0.8  | 4.20E-03 |
|                    | metalloendopeptidase activity               | 14    | 1.9  | 3.80E-02 |
| Downregulated      | Term                                        | Count | %    | P-Value  |
| Cellular Component | axonemal dynein complex                     | 5     | 1.1  | 1.90E-03 |
|                    | integral component of presynaptic membrane  | 11    | 2.4  | 2.60E-03 |
|                    | integral component of postsynaptic membrane | 10    | 2.1  | 3.40E-03 |
|                    | membrane                                    | 54    | 11.5 | 3.30E-02 |
|                    | receptor complex                            | 14    | 3    | 3.80E-02 |

Supplemental Table S3: PS-NP and -MP characterization

|           | NPs           |              | MPs           |               |
|-----------|---------------|--------------|---------------|---------------|
|           | Distilled H2O | Media        | Distilled H2O | Media         |
| Size (nm) | 78.20 ± 0.67  | 87.21 ± 0.17 | 494.9 ± 5.9   | 546.97 ± 8.05 |
| PdI       | 0.19 ± 0.004  | 0.09 ± 0.01  | 0.04 ± 0.005  | 0.1 ± 0.02    |

Methods:

Fluoresbrite YG beads were diluted 1:300 in distilled water or astrocytes complete media (DMEM). Plastics hydrodynamic size was characterized by dynamic light scattering (DLS) using a Zetasizer (PN3702, Malvern, UK).
